# Supplementary material for: Replacement of feed by fresh microalgae as a novel technology to alleviate water deterioration in aquaculture
Source: Royal Society of Chemistry journal article supplement (doi:10.1039/d0ra03090b), 2020-01-01
Supplement: d0ra03090b1.pdf [file d0ra03090b1.pdf]

### Supplementary files

Figure S1. Increase of microalgae addition for water quality control: (a) pH value; (b) DO content. (Stocking densities in Aquaculture 1, 2 and 3 are 0.0050, 0.0025, and 0.0010 g/fish, respectively)

Figure S2. Evolutionary tree of dominant bacteria in samples collected from aquaculture systems

**Table S1. Numerical values for the parameters of aquaculture (6-day culture)**

| fish/100<br>mL | COD            |                | TN    |       | TAN   |       | DO content |       |
|----------------|----------------|----------------|-------|-------|-------|-------|------------|-------|
|                | T <sup>a</sup> | A <sup>b</sup> | T     | A     | T     | A     | T          | A     |
| 2              | ↑85            | ↑34            | ↑22.6 | ↑5.8  | ↑15.8 | ↑2.1  | ↑0.04      | ↑2.40 |
| 4              | ↑121           | ↑51            | ↑30.0 | ↑6.1  | ↑20.5 | ↑4.2  | ↓1.13      | ↑1.41 |
| 6              | ↑147           | ↑91            | ↑35.3 | ↑17.9 | ↑28.6 | ↑9.9  | ↓2.69      | ↑0.41 |
| 8              | ↑221           | ↑99            | ↑47.0 | ↑22.8 | ↑37.8 | ↑11.5 | ↓4.80      | ↓1.06 |
| 10             | ↑342           | ↑109           | ↑68.1 | ↑26.0 | ↑45.8 | ↑13.8 | ↓5.10      | ↓2.28 |

<sup>a</sup> "T" refers to the aquaculture added with traditional fish feed (Figure 1)

<sup>b</sup> "A" refers to the aquaculture added with algae (Figure 2)

**Table S2. Number of sequences and OTU in samples**

|          | Number of sequences | Number of OTU |
|----------|---------------------|---------------|
| Sample 1 | 64125               | 354           |
| Sample 2 | 10680               | 325           |
| Total    | 74805               | 679           |

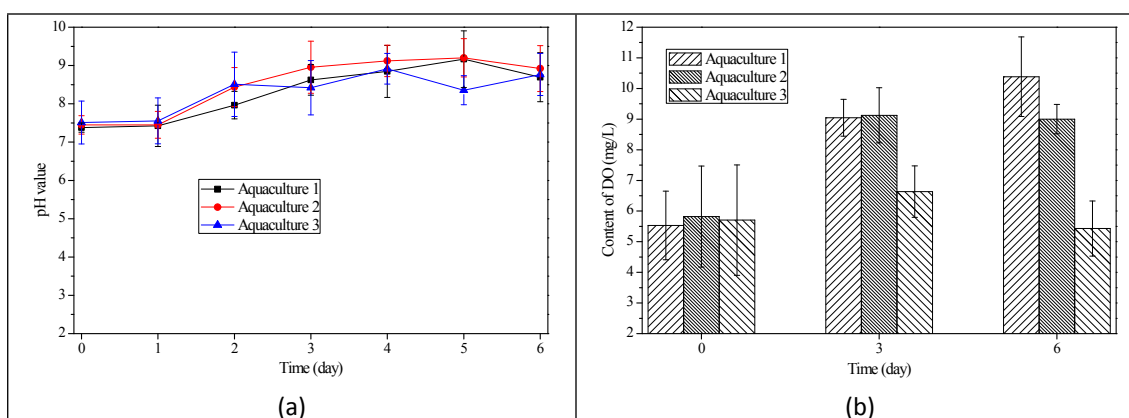

**Figure S1**

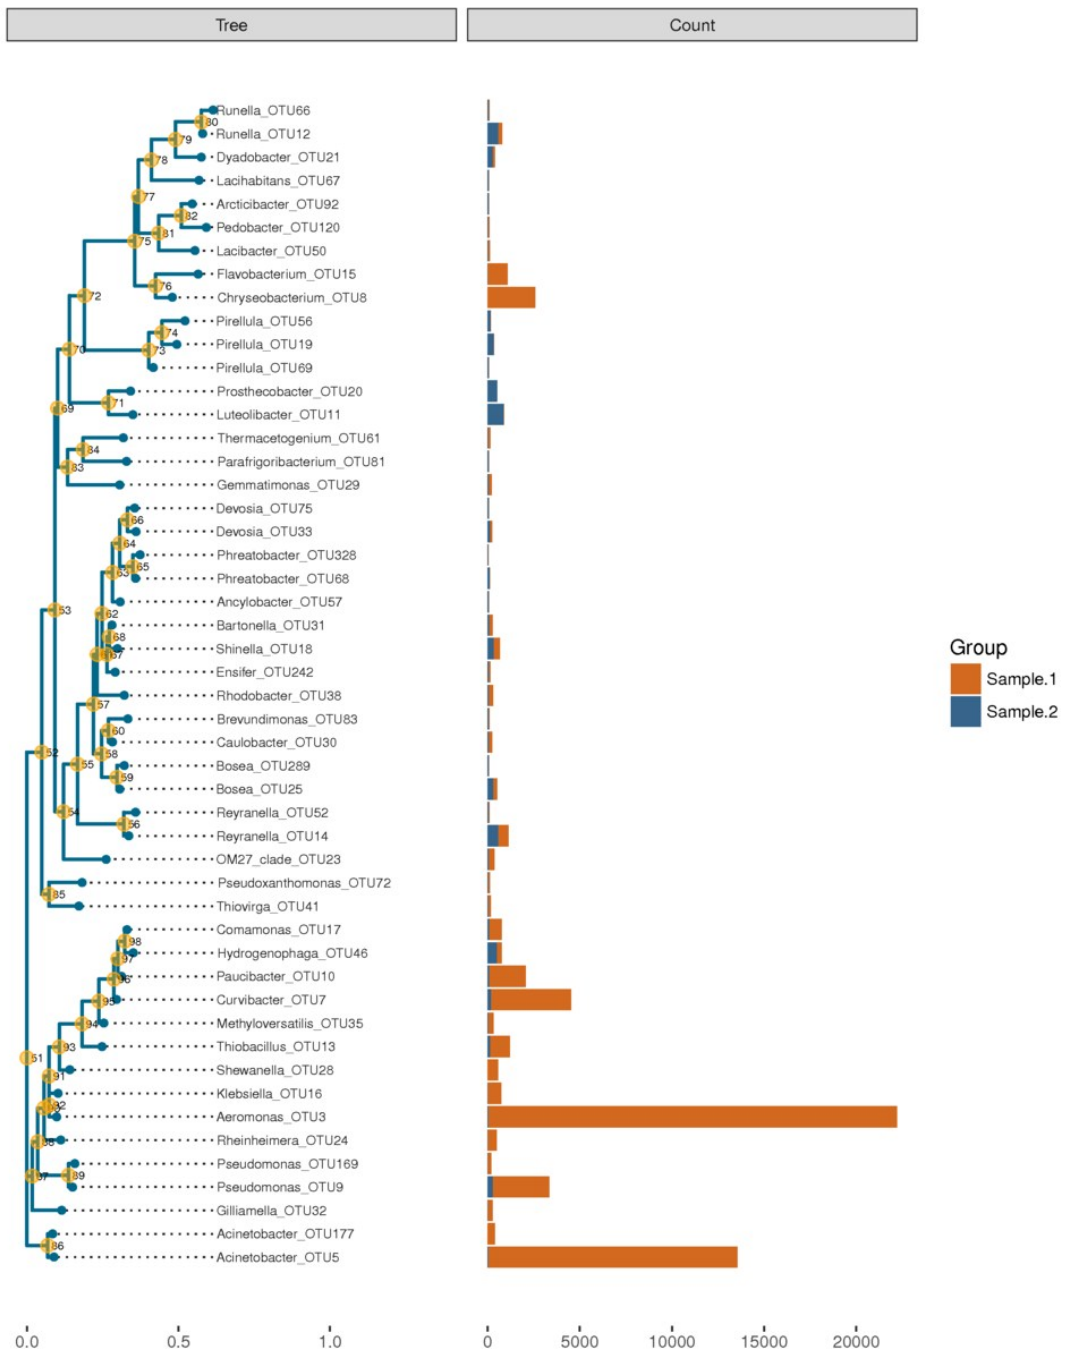

Figure S2
